# Supplementary material for: Rapid Increases in Forest Understory Diversity and Productivity following a Mountain Pine Beetle (Dendroctonus ponderosae) Outbreak in Pine Forests
Source: PubMed Central journal article supplement (PMC4393282; doi:10.1371/journal.pone.0124691), 2015-04-10

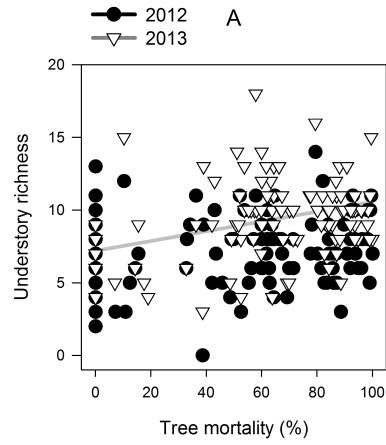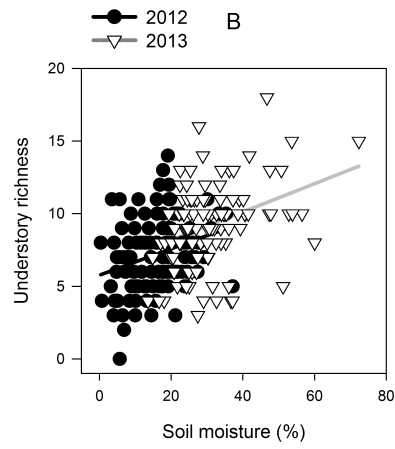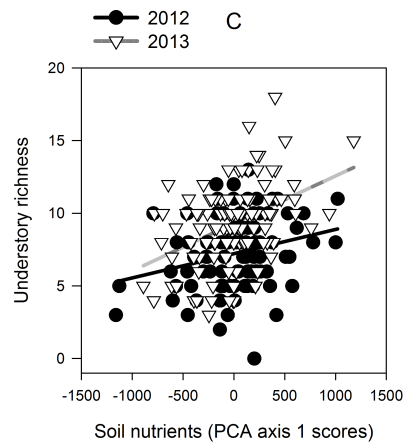

Supplement: pone.0124691.s003.pdf [file pone.0124691.s003.pdf]
