# Supplementary material for: Rapid Increases in Forest Understory Diversity and Productivity following a Mountain Pine Beetle (Dendroctonus ponderosae) Outbreak in Pine Forests
Source: PubMed Central journal article supplement (PMC4393282; doi:10.1371/journal.pone.0124691), 2015-04-10

A) 2012

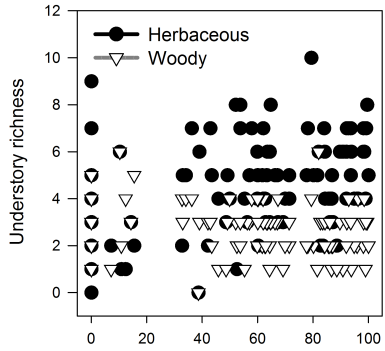

*D. ponderosae*-induced tree mortality (%)

B) 2013

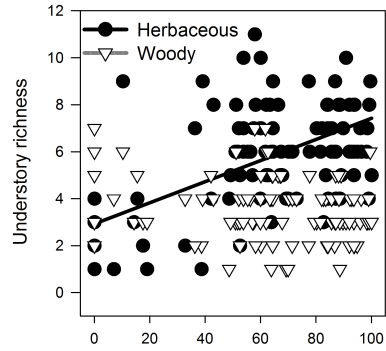

*D. ponderosae*-induced tree mortality (%)

C) 2012

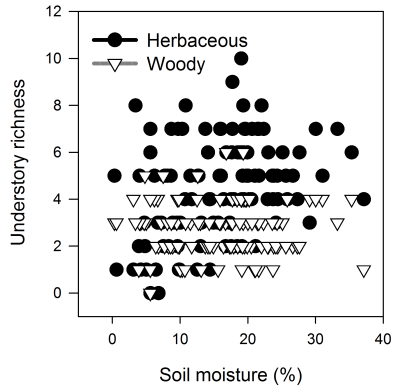

D) 2013

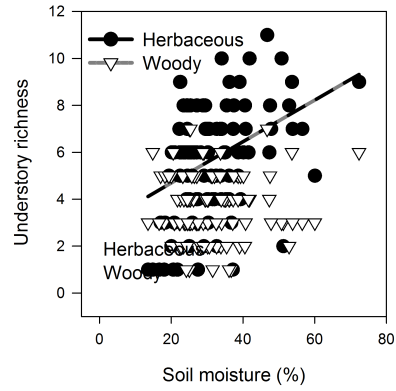

E) 2012

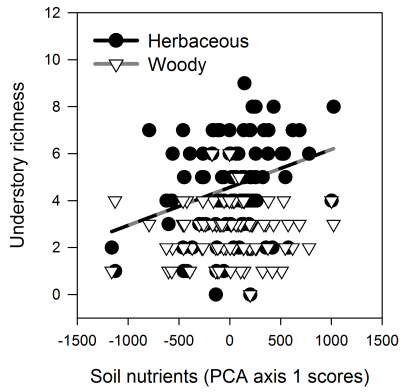

F) 2013

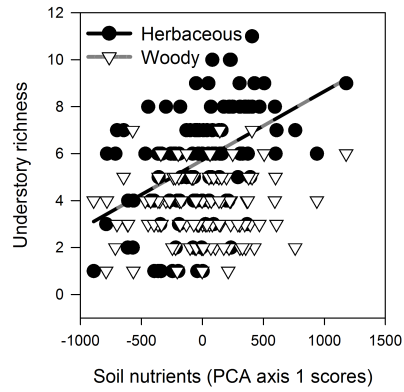

Supplement: pone.0124691.s004.pdf [file pone.0124691.s004.pdf]
